# Supplementary material for: PFKFB4 interacts with ICMT and activates RAS/AKT signaling-dependent cell migration in melanoma
Source: PubMed Central journal article supplement (PMC9348664; doi:10.26508/lsa.202201377), 2022-08-01
Supplement: LSA-2022-01377_SdataF2.1.pdf [file LSA-2022-01377_SdataF2.1.pdf]

Figure 2B:

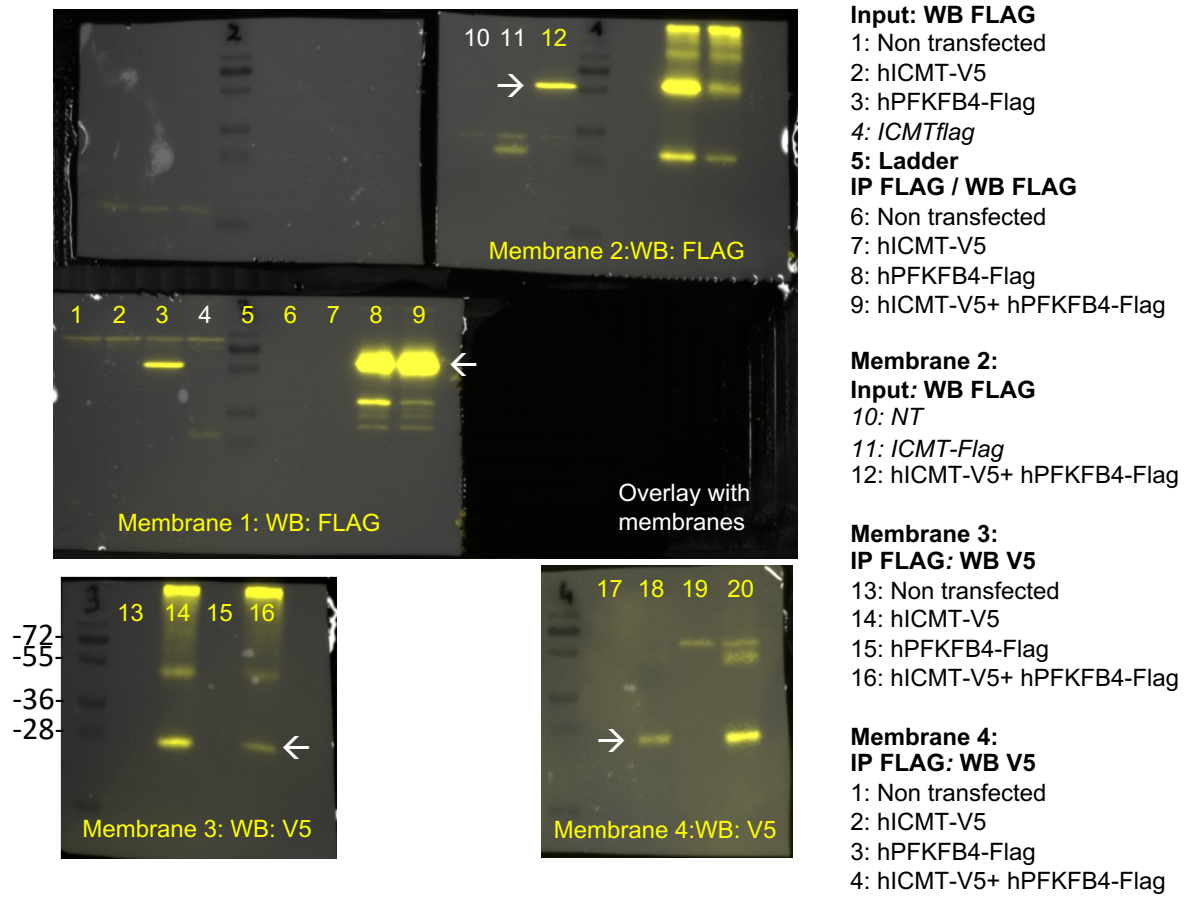

Figure 2D:

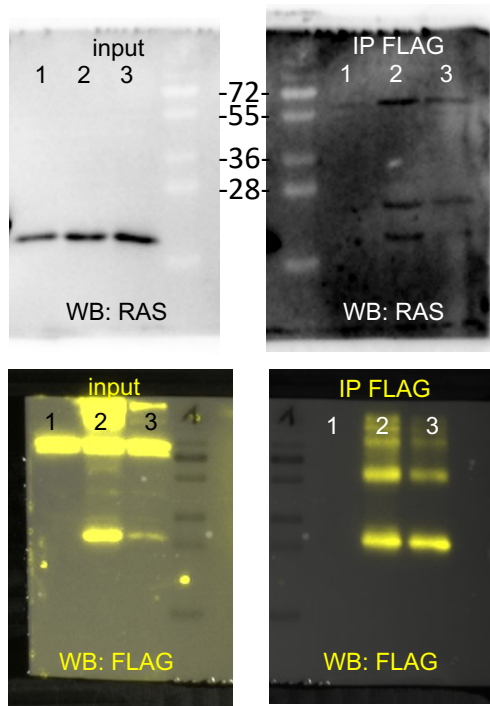

Figure 2D:

1: Non transfected  
 2: hICMT-FLAG-Myc  
 3: hICMT-FLAG-Myc + siPFKFB4
