# Supplementary material for: PFKFB4 interacts with ICMT and activates RAS/AKT signaling-dependent cell migration in melanoma
Source: PubMed Central journal article supplement (PMC9348664; doi:10.26508/lsa.202201377), 2022-08-01

Figure 4A:

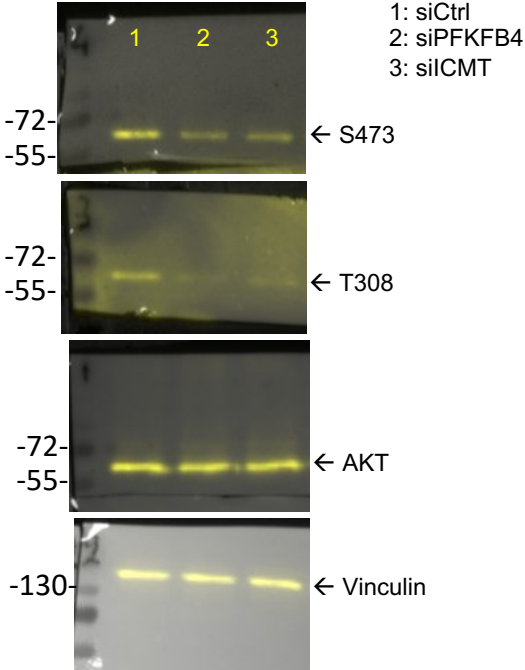

Figure 4C:

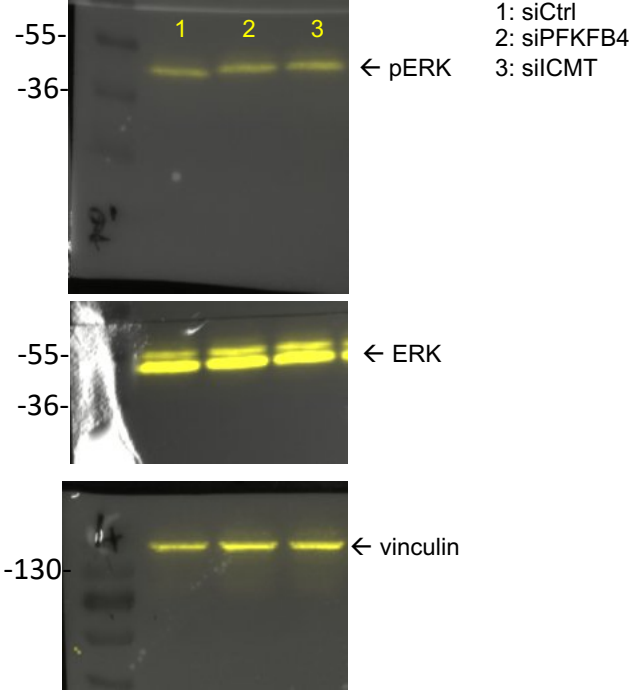

Figure 4D:

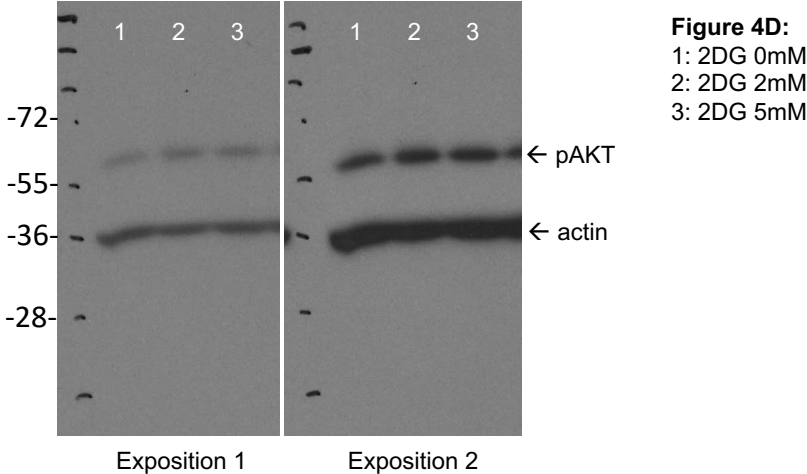

Supplement: LSA-2022-01377_SdataF4.1.pdf [file LSA-2022-01377_SdataF4.1.pdf]
